# Supplementary material for: Points to Consider in Health Assessment of Adult Patients with Primary Antibody Deficiencies
Source: MDPI journal article supplement (doi:10.3390/jcm12186018), 2023-09-17
Supplement: s1 [file s1]

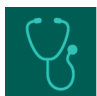

Table S1. General characteristics of patients

| Parameter<br>Patient<br>number | Age<br>(years) | Sex | IEI   | Age at<br>diagnosis<br>(years) | Age of symptom<br>onset (years) | IgRT | IgRT dose<br>(g/kg per month) | IgG<br>Concentration<br>(mg/dl) | Infections | Autoimmunity | BMI   |
|--------------------------------|----------------|-----|-------|--------------------------------|---------------------------------|------|-------------------------------|---------------------------------|------------|--------------|-------|
| 1                              | 67             | F   | IgGSD | 62                             | 54                              | -    | -                             | 738                             | 2,3        | -            | 29    |
| 2                              | 63             | F   | UAD   | 57                             | 51                              | IVIG | 0,39g                         | 628*                            | 1,2,3,5    | RA           | 29.7  |
| 3                              | 20             | F   | IAOD  | 13                             | 1                               | SCIG | 0,43                          | 645*                            | 1,2,3      | -            | 27.3  |
| 4                              | 32             | M   | CVID  | 2                              | 2                               | SCIG | 0,38                          | 711*                            | 1,2,3      | -            | 24.1  |
| 5                              | 35             | M   | UAD   | 28                             | 24                              | SCIG | 0,58                          | 1040*                           | 1          | -            | 16.3  |
| 6                              | 28             | F   | CVID  | 16                             | 1                               | SCIG | 0,58                          | 1270*                           | 1,2,3      | -            | 20.4  |
| 7                              | 52             | M   | UAD   | 49                             | 33                              | -    | -                             | 400                             | 1          | PA           | 23.6  |
| 8                              | 78             | M   | UAD   | 72                             | 55                              | SCIG | 0,42                          | 1070*                           | 4,5        | -            | 24.5  |
| 9                              | 21             | M   | IgGSD | 2                              | 1                               | SCIG | 0,40                          | 1280*                           | 1,2,3      | IBD          | 30.1  |
| 10                             | 40             | M   | IgGSD | 34                             | 14                              | SCIG | 0,41                          | 911*                            | 1,2,7      | ITP          | 21.8  |
| 11                             | 24             | M   | XLA   | 1                              | 1                               | SCIG | 0,47                          | 849*                            | 1,2,3,7    | -            | 19.66 |
| 12                             | 40             | M   | SIgAD | 37                             | 4                               | -    | -                             | 1660                            | 1,2        | PAI          | 15.8  |
| 13                             | 25             | F   | SIgAD | 7                              | 6                               | -    | -                             | 704                             | 1,3        | -            | 14.22 |
| 14                             | 27             | F   | IgGSD | 9                              | 5                               | -    | -                             | 1380                            | 1,4        | -            | 18.4  |
| 15                             | 36             | M   | CVID  | 27                             | 24                              | SCIG | 0,27                          | 454*                            | 1,2,3      | -            | 39.0  |
| 16                             | 26             | M   | SIgAD | 22                             | 20                              | -    | -                             | 1550                            | 1,2        | -            | 19.8  |
| 17                             | 40             | F   | CVID  | 35                             | 30                              | SCIG | 0,53                          | 1450*                           | 1,2        | -            | 19.6  |
| 18                             | 38             | M   | CVID  | 31                             | 24                              | SCIG | 0,35                          | 1100*                           | 1,2,3,7    | AIHA         | 26.2  |
| 19                             | 36             | F   | SIgAD | 34                             | 24                              | -    | -                             | 916                             | 3          | AITD, ABA    | 23.4  |
| 20                             | 57             | M   | CVID  | 50                             | 12                              | SCIG | 0,45                          | 417*                            | 1,2,3      | -            | 22.1  |
| 21                             | 36             | F   | IgGSD | 35                             | 34                              | -    | -                             | 903                             | 1,2,3      | AITD         | 22.5  |
| 22                             | 43             | F   | UAD   | 38                             | 34                              | -    | -                             | 1190                            | 1,2        | AITD         | 19.26 |
| 23                             | 41             | F   | CVID  | 37                             | 13                              | SCIG | 0,45                          | 190*                            | 1,2,5      | AIHA, ITP    | 25.78 |
| 24                             | 29             | F   | ARA   | 25                             | 1                               | SCIG | 0,6                           | 656*                            | 1,2,5      | -            | 15.6  |
| 25                             | 23             | M   | CVID  | 12                             | 2                               | SCIG | 0,5                           | 787*                            | 1,2,3      | -            | 20.0  |
| 26                             | 27             | F   | CVID  | 13                             | 10                              | SCIG | 0,47                          | 706*                            | 1,2,3      | -            | 22.1  |
| 27                             | 56             | M   | UAD   | 52                             | 40                              | SCIG | 0,5                           | 989*                            | 1,2        | -            | 19.5  |
| 28                             | 50             | F   | SIgAD | 44                             | 13                              | -    | -                             | 1760                            | 1,2        | AITD         | 21.5  |
| 29                             | 41             | M   | CVID  | 35                             | 35                              | SCIG | 0,3                           | 870*                            | 1,2,6      | Psoriasis    | 30.6  |
| 30                             | 43             | F   | UAD   | 41                             | 19                              | -    | -                             | 543                             | 1,2,3,6    | -            | 20.4  |
| 31                             | 22             | M   | IAOD  | 4                              | 1                               | SCIG | 0,68                          | 1380*                           | 1,2,3      | -            | 16.6  |
| 32                             | 58             | F   | ARA   | 56                             | 48                              | SCIG | 0,53                          | 528*                            | 1,2,3      | -            | 19.7  |
| 33                             | 48             | F   | UAD   | 43                             | 23                              | -    | -                             | 612                             | 1,2        | -            | 22.3  |
| 34                             | 40             | F   | CVID  | 28                             | 25                              | SCIG | 0,50                          | 78*                             | 1,2,3      | -            | 20.8  |
| 35                             | 61             | F   | UAD   | -                              | -                               | -    | -                             | 429                             | 1,2        | -            | 33.12 |
| 36                             | 38             | F   | CVID  | 36                             | 1                               | SCIG | 0,59                          | 824*                            | 1,2,3      | -            | 17.0  |
| 37                             | 61             | F   | UAD   | 59                             | 20                              | -    | -                             | 578                             | 1,2,3      | -            | 20.1  |
| 38                             | 36             | F   | UAD   | 34                             | 1                               | SCIG | 0,58                          | 827*                            | 1,2        | AH, AITD     | 19.0  |
| 39                             | 48             | F   | CVID  | 44                             | 39                              | SCIG | 0,47                          | 1000*                           | 1,2        | -            | 21.9  |
| 40                             | 19             | M   | UAD   | 9                              | 1                               | SCIG | 0,59                          | 807*                            | 1,2,4      | IBD          | 17.4  |
| 41                             | 58             | M   | CVID  | 49                             | 46                              | SCIG | 0,46                          | 999*                            | 1,2,3,5    | -            | 22.49 |
| 42                             | 51             | F   | UAD   | 48                             | 7                               | -    | -                             | 609                             | 1,2,5      | -            | 25.3  |
| 43                             | 27             | F   | IgGSD | 3                              | 2                               | -    | -                             | 748                             | 1,2,5      | -            | 27    |
| 44                             | 38             | M   | SIgMD | 32                             | 30                              | -    | -                             | 1400                            | 1,2        | -            | 19.26 |
| 45                             | 37             | F   | SIgAD | 35                             | 32                              | -    | -                             | 1860                            | 1          | AITD         | 21.51 |
| 46                             | 67             | M   | UAD   | 55                             | 64                              | SCIG | 0,29                          | 751*                            | 1,2        | VAS          | 30.1  |

|    |    |   |       |    |    |      |      |       |         |                |       |
|----|----|---|-------|----|----|------|------|-------|---------|----------------|-------|
| 47 | 21 | M | IgGSD | 14 | 1  | SCIG | 0,31 | 919*  | 1,2     | -              | 29.8  |
| 48 | 39 | M | CVID  | 28 | 26 | SCIG | 0,5  | 510*  | 2       | IBD            | 19.38 |
| 49 | 63 | F | IgGSD | 59 | 14 | SCIG | 0,40 | 1140* | 1,2,3   | SS             | 31.2  |
| 50 | 19 | F | UAD   | 7  | 7  | SCIG | 0,36 | 719*  | 1,2     | -              | 20.0  |
| 51 | 33 | F | CVID  | 17 | 1  | SCIG | 0,47 | 551*  | 1,2,7   | -              | 27.5  |
| 52 | 23 | F | SIgMD | 17 | 13 | -    | -    | 867   | 1       | -              | 24.6  |
| 53 | 21 | M | ARA   | 9  | 8  | SCIG | 0,46 | 935*  | 1,2,8   | -              | 23.7  |
| 54 | 32 | F | IgGSD | 28 | 15 | -    | -    | 999   | 1,2     | -              | 21.2  |
| 55 | 20 | M | XLA   | 6  | 6  | SCIG | 0,37 | 871*  | 2,3     | -              | 18.8  |
| 56 | 28 | M | CVID  | 13 | 8  | SCIG | 0,31 | 570*  | 1,2     | -              | 20.2  |
| 57 | 48 | F | CVID  | 35 | 32 | SCIG | 0,58 | 887*  | 1,2,3,4 | -              | 18.9  |
| 58 | 65 | F | IgGSD | 59 | 4  | SCIG | 0,47 | 1060* | 1,2,3,5 | -              | 26.2  |
| 59 | 46 | F | SIgAD | 42 | 23 | -    | -    | 2170  | 1,2,3,5 | -              | 19.7  |
| 60 | 39 | F | ARA   | 36 | 4  | SCIG | 0,44 | 336*  | 1,2,3   | -              | 22.00 |
| 61 | 41 | F | UAD   | 31 | 14 | SCIG | 0,39 | 933*  | 1,2,5   | -              | 21.6  |
| 62 | 34 | F | IgGSD | 12 | 1  | SCIG | 0,5  | 933*  | 1,2,3,5 | -              | 22.66 |
| 63 | 42 | M | XLA   | 4  | 4  | SCIG | 0,67 | 394*  | 1,2,3,7 | -              | 18.1  |
| 64 | 47 | F | CVID  | 41 | 31 | SCIG | 0,58 | 1120* | 1,2,3   | -              | 24.45 |
| 65 | 27 | F | IgGSD | 16 | 9  | SCIG | 0,43 | 956*  | 1,2,3   | -              | 25.7  |
| 66 | 29 | F | UAD   | 4  | 4  | -    | -    | 1720  | 1,2     | -              | 16.18 |
| 67 | 42 | M | SIgAD | 38 | 36 | -    | -    | 1640  | 1,2     | IBD            | 25.06 |
| 68 | 20 | M | SIgMD | 7  | 18 | -    | -    | 1170  | 1,2     | AITD           | 21.6  |
| 69 | 54 | F | UAD   | 53 | 5  | SCIG | 0,47 | 780*  | 1,2,3   | -              | 23.8  |
| 70 | 44 | F | CVID  | 19 | 10 | SCIG | 0,41 | 700*  | 1,2,3,4 | CD, IBD        | 29.26 |
| 71 | 20 | F | SIgAD | 10 | 9  | -    | -    | 930   | 1       | -              | 20.32 |
| 72 | 50 | M | CVID  | 47 | 23 | SCIG | 0,42 | 983*  | 1,2,3   | VAS, psoriasis | 25.5  |
| 73 | 65 | F | SIgAD | 63 | 47 | -    | -    | 1530  | 1,2,3,5 | -              | 41.02 |
| 74 | 50 | F | UAD   | 46 | 46 | SCIG | 0,56 | 1150* | 1,3,3   | -              | 19.9  |
| 75 | 37 | M | CVID  | 31 | 29 | SCIG | 0,35 | 868*  | 1,2,3   | AIHA           | 25.9  |
| 76 | 28 | M | CVID  | 27 | 27 | SCIG | 0,39 | 23,1* | 1,2     | -              | 23.8  |
| 77 | 49 | F | CVID  | 27 | 1  | SCIG | 0,32 | 490*  | 1,2,3   | -              | 34.6  |
| 78 | 30 | F | CVID  | 15 | 7  | SCIG | 0,58 | 1160* | 1,2,3   | -              | 17.2  |
| 79 | 39 | F | CVID  | 37 | 29 | SCIG | 0,5  | 407*  | 1,2,3   | -              | 22.3  |
| 80 | 29 | M | UAD   | 6  | 1  | SCIG | 0,32 | 888*  | 1,2     | -              | 31.4  |
| 81 | 65 | F | CVID  | 52 | 32 | SCIG | 0,74 | 1300* | 1,2,3   | -              | 15.99 |
| 82 | 55 | F | UAD   | 49 | 47 | SCIG | 0,33 | 953*  | 1,2,3   | VAS            | 31.89 |
| 83 | 56 | F | UAD   | 48 | 48 | -    | -    | 509   | 1,2,7   | -              | 41.4  |
| 84 | 62 | F | SIgMD | 55 | 55 | -    | -    | 903   | 1,2,3,5 | GD             | 29.41 |
| 85 | 40 | F | UAD   | 31 | 29 | SCIG | 0,47 | 1170* | 1,2,3   | -              | 24.6  |
| 86 | 41 | M | CVID  | 23 | 15 | SCIG | 0,47 | 435*  | 1,2,3   | -              | 23.2  |
| 87 | 58 | M | SIgAD | 52 | 46 | -    | -    | 1400  | 2,3     | -              | 38.31 |
| 88 | 24 | M | SIgAD | 17 | 1  | -    | -    | 1440  | 1,2     | -              | 30.9  |
| 89 | 41 | F | UAD   | 40 | 6  | SCIG | 0,66 | 431*  | 1,2,3   | MG             | 15.8  |
| 90 | 73 | F | UAD   | 67 | 4  | -    | -    | 465   | 7       | -              | 19.5  |
| 91 | 64 | F | UAD   | 59 | 58 | SCIG | 0,68 | 1160* | 1,2,3   | RA             | 16.4  |
| 92 | 41 | M | CVID  | 36 | 32 | SCIG | 0,35 | 794*  | 2,3     | APS, ITP       | 25.7  |
| 93 | 69 | M | CVID  | 58 | 20 | SCIG | 0,6  | 1240* | 1,2,3   | -              | 21.1  |
| 94 | 35 | M | XLA   | 3  | 1  | SCIG | 0,35 | 936*  | 1,2,3   | -              | 24.6  |

Abbreviations: F - Female, M- Male, IEI –Inborn Errors of Immunity, 1 - Upper respiratory tract infections without sinusitis, 2 - Sinusitis, 3 - Lower respiratory tract infections, 4 - Digestive tract infections

5 - Urinary tract infections, 6 - Heart infections, 7- Skin infections, 8 - Brain and meningeal infections, ARA – Autosomal Recessive Agammaglobulinemia, CVID – Common Variable Immunodeficiency, IAOD – Immunodeficiency Associated With Other Specified Major Defects, IgGSD – IgG Subclass Deficiency, SIgAD – Selective IgA Deficiency, SIgMD – Selective IgM Deficiency, XLA - X-linked agammaglobulinemia, UAD – Unclassified antibody deficiency, IgRT - Immunoglobulin Replacement Therapy, IVIG – Intravenous IgRT, SCIG – Subcutaneous IgRT, RA -

Rheumatoid Arthritis, **PA** - Psoriatic Arthritis, **IBD** - Inflammatory Bowel Disease, **ITP** - idiopathic thrombocytopenic purpura, **PAI** - Primary Adrenal Insufficiency, **AIHA** - Autoimmune Hemolytic Anemia, **AITD** - Autoimmune Thyroid Disease, **ABA** - Addison–Biermer Anemia, **AH** - Autoimmune Hepatitis, **VAS** - vasculitis, **SS** - Sjogren's syndrome, **CD** - celiac disease, **GD**- Graves' disease, **MG** - Myasthenia Gravis, **APS** - Antiphospholipid Syndrome,, \* IgRT, **BMI** - Body Mass Index

**Table S2.** Detailed analysis of laboratory tests.

| Parameter           | WBC<br>(G/l) | HGB<br>(g/dl)      | PLT<br>(G/l) | Neutro-<br>cytes (G/l) | Lympho-<br>cytes (G/l) | Creatinine<br>(mg/dl) | eGFR<br>(ml/min) | Vitamin<br>D3 (ng/ml) | Folic acid<br>(ng/ml) | Vita-<br>minB12<br>(pg/ml) | Ferritin<br>(ng/ml) | Total<br>protein<br>(g/dl) | Albumin<br>(g/dl) | CRP<br>(mg/l) |
|---------------------|--------------|--------------------|--------------|------------------------|------------------------|-----------------------|------------------|-----------------------|-----------------------|----------------------------|---------------------|----------------------------|-------------------|---------------|
| Reference<br>values | 3,9-10,2     | F:12-16<br>M:14-18 | 130-400      | 1,5-7,7                | 1,1-4,4                | 0,51-0,95             | >90              | 30-50                 | 4,6-18,7              | 191-663                    | 30-400              | 6-8                        | 3,5-5,2           | <5            |
| Patient num-<br>ber |              |                    |              |                        |                        |                       |                  |                       |                       |                            |                     |                            |                   |               |
| 1                   | 4,77         | 13,7               | 276          | 2,56                   | 1,46                   | 0,8                   | 78               | 28,51                 | 13,7                  | 382,7                      | 98                  | 6,76                       | 4,06              | <0,6          |
| 2                   | 7,35         | 12,1               | 243          | 4,18                   | 2,29                   | 0,55                  | 102              | 13,18                 | 4,2                   | 438,7                      | 30                  | 6,69                       | 3,69              | 12            |
| 3                   | 6,12         | 12,4               | 133          | 2,39                   | 3,11                   | 0,47                  | 145              | 44,99                 | 2,8                   | 593,6                      | 148                 | 6,02                       | 3,52              | 5,8           |
| 4                   | 6,77         | 13,7               | 243          | 4,26                   | 1,54                   | 0,89                  | 115              | 18,78                 | 10,7                  | 329,7                      | 11                  | 6,43                       | 3,29              | 9,1           |
| 5                   | 2,18         | 10,6               | 48           | 1,66                   | 0,27                   | 2,05                  | 41               | 5,31                  | 16,1                  | 776,3                      | 908                 | 4,8                        | 2,98              | 0,7           |
| 6                   | 2,99         | 13,2               | 252          | 1,3                    | 1,25                   | 0,6                   | 126              | 23,63                 | 5,8                   | 292,1                      | 17                  | 6,64                       | 4,23              | <0,6          |
| 7                   | 6,26         | 15,6               | 221          | 3,29                   | 2,19                   | 0,91                  | 98               | 43,46                 | 18,07                 | 474                        | 28                  | 6,5                        | 5,05              | <0,6          |
| 8                   | 7,35         | 13,4               | 398          | 5,0                    | 1,63                   | 1,03                  | 70               | 53,2                  | 8,8                   | 253,1                      | 496                 | 6,49                       | 3,73              | 1,1           |
| 9                   | 7,82         | 15,4               | 228          | 3,38                   | 3,05                   | 0,9                   | 123              | 43,1                  | 2,4                   | 337,3                      | 131                 | 7,59                       | 4,39              | 1,5           |
| 10                  | 5,51         | 16,6               | 286          | 2,19                   | 1,63                   | 0,75                  | 116              | 23,74                 | 10,0                  | 348,3                      | 183                 | 7,29                       | 4,46              | 5,4           |
| 11                  | 6,62         | 17,4               | 196          | 4,24                   | 1,77                   | 0,8                   | 127              | 34,97                 | 2,4                   | 487                        | 74                  | 5,94                       | 2,67              | 1,1           |
| 12                  | 6,62         | 17,4               | 196          | 4,24                   | 1,77                   | 0,9                   | 108              | 61,55                 | 11,3                  | 647,4                      | 74                  | 7,98                       | 4,81              | <0,6          |
| 13                  | 9,61         | 13,2               | 367          | 6,14                   | 1,46                   | 0,53                  | 133              | 49,88                 | 9,1                   | 776,6                      | 71                  | 5,93                       | 3,33              | 3,1           |
| 14                  | 6,76         | 13,9               | 342          | 3,51                   | 1,1                    | 0,48                  | 136              | 37,66                 | 6,4                   | 600,6                      | 101                 | 7,0                        | 3,54              | 6,6           |
| 15                  | 7,04         | 14,7               | 303          | 5,02                   | 1,21                   | 0,57                  | 135              | 17,82                 | 7,2                   | 241,3                      | 197                 | 6,72                       | 4,02              | 8,0           |

|    |       |      |     |      |      |      |     |       |      |       |      |      |      |      |
|----|-------|------|-----|------|------|------|-----|-------|------|-------|------|------|------|------|
| 16 | 5,86  | 12   | 264 | 3,61 | 1,56 | 1,16 | 88  | 18,43 | 5,6  | 428,1 | 11   | 6,47 | 3,88 | 0,7  |
| 17 | 2,8   | 13,3 | 186 | 1,6  | 0,91 | 0,74 | 103 | 31,79 | 14,9 | 390,0 | 12   | 7,26 | 4,38 | 0,8  |
| 18 | 6,15  | 12   | 161 | 5,03 | 0,72 | 0,7  | 122 | 22,3  | 4    | 510   | 623  | 5,85 | 3,66 | 2,1  |
| 19 | 3,18  | 11,3 | 64  | 1,08 | 1,39 | 0,53 | 124 | 14,13 | 8,3  | 76,04 | 171  | 6,01 | 4,06 | 1,3  |
| 20 | 5,21  | 13,9 | 336 | 2,86 | 1,25 | 0,47 | 125 | 24,19 | 1,9  | 218,5 | 215  | 6,8  | 3,59 | <0,6 |
| 21 | 9,01  | 12,5 | 264 | 2,62 | 1,45 | 0,73 | 107 | 44,28 | 3,3  | 353,2 | 7    | 6,54 | 3,84 | 1,0  |
| 22 | 4,23  | 11,3 | 305 | 2,49 | 1,38 | 0,75 | 98  | 29,11 | 8,0  | 593,1 | 2    | 7,8  | 4,6  | <0,6 |
| 23 | 3,32  | 12,1 | 110 | 1,86 | 0,91 | 1,59 | 38  | 77,27 | >40  | 1061  | 136  | 6,46 | 4,12 | 4,1  |
| 24 | 8,59  | 13,2 | 236 | 4,75 | 3,15 | 0,85 | 94  | 49,3  | 4,4  | 347,3 | 37   | 7,32 | 4,27 | 1,7  |
| 25 | 6,18  | 12,4 | 233 | 4,26 | 1,02 | 0,79 | 129 | 8,78  | 3,3  | 370   | 573  | 6,44 | 3,72 | 30,6 |
| 26 | 6,61  | 12,9 | 348 | 4,0  | 2,01 | 0,64 | 124 | 40,24 | 5,7  | 300,6 | 28   | 6,57 | 3,82 | 6,7  |
| 27 | 13,96 | 14,4 | 250 | 8,49 | 4,09 | 0,99 | 86  | 31,97 | 6,5  | 629,3 | 282  | 6,68 | 3,57 | 12,5 |
| 28 | 4,67  | 12,7 | 160 | 1,95 | 2,31 | 0,72 | 99  | 37,67 | 9,6  | 198,9 | 53   | 7,08 | 4,21 | 1,7  |
| 29 | 12,23 | 15,4 | 222 | 10,2 | 1,25 | 1,03 | 91  | 57,73 | 5,7  | 289,2 | 150  | 5,92 | 3,52 | 23,4 |
| 30 | 5,88  | 11,1 | 227 | 2,68 | 1,89 | 0,79 | 93  | 37,79 | 11,8 | 505,4 | 11   | 5,95 | 3,58 | 1,8  |
| 31 | 2,94  | 15,1 | 144 | 1,09 | 1,15 | 0,83 | 127 | 27,19 | 2,9  | 505,3 | 64   | 7,42 | 4,78 | <0,6 |
| 32 | 11,04 | 13   | 246 | 8,04 | 2,4  | 0,5  | 109 | 27,8  | 9,9  | 552,8 | 115  | 5,89 | 3,7  | 25,4 |
| 33 | 3,42  | 12   | 153 | 2,24 | 0,83 | 0,46 | 120 | 53,24 | 11   | 1238  | 29   | 6,59 | 4,4  | <0,6 |
| 34 | 2,95  | 10,3 | 85  | 1,82 | 0,75 | 0,91 | 81  | 22,79 | 7,7  | 438   | 6,37 | 6,76 | 4,08 | 1,1  |
| 35 | 6,59  | 14,2 | 251 | 4,71 | 1,23 | 0,55 | 102 | 35,87 | 5,4  | 767,9 | 33   | 7,08 | 4,49 | 2,4  |
| 36 | 7,65  | 12,1 | 326 | 4,46 | 2,02 | 0,79 | 97  | 14,38 | 3,8  | 1278  | 69   | 5,18 | 2,79 | 2,3  |
| 37 | 6,26  | 12,7 | 195 | 2,88 | 2,43 | 0,68 | 96  | 19,56 | 5,3  | 216,5 | 45   | 5,4  | 3,46 | <0,6 |
| 38 | 4,15  | 12,6 | 356 | 2,18 | 1,31 | 0,55 | 123 | 14,72 | 8,6  | 253,6 | 7    | 7,72 | 4,76 | 1,6  |
| 39 | 7,59  | 12,6 | 300 | 4,11 | 2,57 | 0,88 | 80  | 27,65 | 2,7  | 418,6 | 8,7  | 6,51 | 3,93 | <0,6 |
| 40 | 4,72  | 14,5 | 270 | 2,14 | 2,08 | 0,7  | 138 | 33,7  | 17,6 | 738,6 | 23   | 7,11 | 4,69 | 0,9  |
| 41 | 10,64 | 16,6 | 376 | 8,13 | 1,53 | 0,79 | 100 | 31,74 | 3,4  | 455,1 | 401  | 7,63 | 4,41 | 1,4  |

|    |       |      |     |      |      |      |     |       |      |        |      |      |      |       |
|----|-------|------|-----|------|------|------|-----|-------|------|--------|------|------|------|-------|
| 42 | 11,05 | 14,1 | 214 | 7,79 | 2,37 | 0,7  | 102 | 25,31 | 4,8  | 348,6  | 31   | 7,13 | 4,24 | 0,83  |
| 43 | 7,12  | 15,4 | 225 | 5,57 | 0,93 | 0,56 | 129 | 22,34 | 4,8  | 177,4  | 126  | 7,49 | 4,19 | 4,8   |
| 44 | 3,95  | 14,4 | 215 | 1,91 | 1,44 | 1,01 | 95  | 52,93 | 4,4  | 342,6  | 51   | 7,10 | 4,02 | <0,6  |
| 45 | 5,2   | 11,9 | 257 | 3,03 | 1,15 | 0,56 | 121 | 23,72 | 5,5  | 327,2  | 12   | 7,64 | 4,29 | 10    |
| 46 | 7,85  | 13,8 | 165 | 6,74 | 0,68 | 0,97 | 81  | 43,33 | 8,9  | 182,2  | 50   | 5,9  | 3,99 | 2,1   |
| 47 | 9,39  | 15,1 | 213 | 4,99 | 3,23 | 0,98 | 112 | 9,2   | 7,5  | 217,4  | 123  | 6,6  | 4,16 | <0,6  |
| 48 | 4,83  | 11,5 | 102 | 3,75 | 0,6  | 0,85 | 111 | 6,75  | 7,7  | 105,2  | 174  | 6,10 | 3,48 | 1,8   |
| 49 | 5,85  | 12,9 | 255 | 4,27 | 1,01 | 0,91 | 69  | 20,73 | 2,1  | 343    | 44   | 6,87 | 3,65 | 3,0   |
| 50 | 4,91  | 12,9 | 164 | 2,04 | 2,46 | 0,64 | 131 | 16,08 | 6    | 394,9  | 170  | 7,22 | 4,5  | 1,5   |
| 51 | 1,95  | 10,9 | 120 | 0,96 | 0,84 | 0,47 | 133 | 17,35 | 3,5  | 404,3  | 45   | 5,34 | 2,86 | 13,4  |
| 52 | 5,7   | 13,1 | 231 | 3,87 | 1,17 | 0,59 | 131 | 19,25 | 5,0  | 329,2  | 41   | 6,68 | 4,27 | 2,4   |
| 53 | 6,89  | 14,9 | 181 | 3,15 | 2,89 | 0,92 | 121 | 31,84 | 7,7  | 349,4  | 225  | 7,13 | 4,21 | 2,8   |
| 54 | 5,69  | 12,2 | 153 | 2,32 | 2,69 | 0,91 | 85  | 42,81 | 4,3  | 179,9  | 37,4 | 6,1  | 3,32 | 3,6   |
| 55 | 6,31  | 15,8 | 387 | 2,8  | 2,33 | 0,67 | 140 | 22,58 | >40  | 780,6  | 74   | 7,6  | 4,98 | 0,7   |
| 56 | 6,39  | 15,8 | 184 | 3,29 | 2,63 | 0,68 | 134 | 10,5  | 2,8  | 723,6  | 41   | 7,05 | 4,56 | <0,6  |
| 57 | 1,36  | 8,6  | 37  | 0,54 | 0,68 | 0,65 | 107 | 24    | 3,6  | 293,9  | 11   | 4,44 | 2,66 | 4,2   |
| 58 | 7,58  | 14,4 | 261 | 3,73 | 2,62 | 0,93 | 66  | 38,65 | 4,1  | 293,3  | 50   | 7,99 | 4,61 | 4,6   |
| 59 | 4,94  | 12,4 | 277 | 3,01 | 1,35 | 0,67 | 109 | 31,66 | 10,6 | 302,2  | 18   | 8,27 | 4,71 | 0,8   |
| 60 | 5,89  | 12   | 307 | 3,17 | 0,79 | 0,6  | 128 | 43,63 | 3,2  | 287,5  | 1102 | 6,27 | 4,31 | 1,4   |
| 61 | 6,39  | 13,1 | 125 | 3,87 | 1,64 | 1,21 | 75  | 26,85 | 4,9  | 474,7  | 19   | 7,64 | 4,54 | 1,2   |
| 62 | 5,9   | 13,7 | 364 | 3,59 | 0,86 | 0,55 | 125 | 24,56 | 6,0  | 406,6  | 48   | 6,88 | 3,78 | 1,0   |
| 63 | 7,7   | 10,4 | 71  | 7,12 | 0,33 | 0,63 | 123 | 27,67 | 3,2  | 219,2p | 48   | 5,29 | 2,49 | 136,6 |
| 64 | 6,8   | 12,9 | 260 | 4,92 | 1,33 | 0,53 | 115 | 34,88 | 6,1  | 236,9  | 26   | 7,17 | 4,20 | 9,3   |
| 65 | 7,92  | 14   | 269 | 4,97 | 2,38 | 0,63 | 125 | 26,12 | 5,3  | 379,1  | 128  | 7,19 | 4,16 | 39,4  |
| 66 | 3,64  | 12,4 | 311 | 2,0  | 1,38 | 0,69 | 120 | 25,58 | 9,0  | 541,0  | 28   | 7,63 | 4,35 | 0,9   |
| 67 | 6,76  | 13,7 | 293 | 4,61 | 1,37 | 0,87 | 107 | 27,87 | 7,2  | 347    | 96   | 7,39 | 4,18 | 1,7   |

|    |       |      |     |      |      |      |     |       |       |       |      |      |      |      |
|----|-------|------|-----|------|------|------|-----|-------|-------|-------|------|------|------|------|
| 68 | 7,09  | 15,1 | 326 | 3,12 | 2,87 | 1,13 | 94  | 19,36 | 8,4   | 674,9 | 55   | 7,41 | 4,12 | 0,8  |
| 69 | 5,19  | 13   | 242 | 1,56 | 3,07 | 0,61 | 105 | 31,13 | 16,9  | 908,4 | 49   | 6,0  | 3,9  | <0,6 |
| 70 | 4,68  | 12   | 242 | 2,05 | 2,09 | 0,63 | 111 | 57,84 | 6,4   | 969,1 | 22   | 6,55 | 3,93 | 34,6 |
| 71 | 6,11  | 14,8 | 206 | 3,56 | 2,1  | 0,8  | 108 | 22,31 | 10,3  | 335,3 | 20   | 7,38 | 4,83 | <0,6 |
| 72 | 5,88  | 10,9 | 191 | 6,35 | 1,57 | 0,68 | 113 | 14,49 | 19,9  | 294,1 | 476  | 6,15 | 3,17 | 32,3 |
| 73 | 5,24  | 11,8 | 215 | 2,62 | 1,84 | 1,22 | 47  | 52,22 | 4,2   | 500,6 | 644  | 6,54 | 3,75 | 4,2  |
| 74 | 5,9   | 12,5 | 314 | 2,99 | 2,23 | 0,87 | 79  | 92,6  | 8,6   | 314,8 | 45   | 6,72 | 4,04 | <0,6 |
| 75 | 6,05  | 13,8 | 69  | 4,76 | 0,84 | 0,92 | 107 | 26,62 | 3,7   | 410,5 | 56   | 5,77 | 3,28 | 3,7  |
| 76 | 8,32  | 15,2 | 258 | 4,9  | 2,33 | 0,93 | 112 | 45,25 | 4,9   | 410,3 | 56   | 6,17 | 4,40 | 1,7  |
| 77 | 6,74  | 13,1 | 157 | 4,79 | 1,33 | 0,68 | 105 | 36,6  | 10,8  | 515,4 | 24   | 5,8  | 3,74 | 9,4  |
| 78 | 3,15  | 13,7 | 205 | 0,79 | 1,57 | 0,72 | 114 | 33,02 | 4,5   | 384,3 | 2,25 | 6,47 | 3,91 | 1,1  |
| 79 | 10,53 | 11,5 | 466 | 6,9  | 1,85 | 0,63 | 115 | 27,8  | 4,1   | 810,6 | 63   | 5,89 | 3,19 | 130  |
| 80 | 1,37  | 16,1 | 232 | 0,3  | 0,95 | 0,98 | 105 | 10,08 | 9,1   | 831,1 | 212  | 7,8  | 4,77 | 5,9  |
| 81 | 5,92  | 13,2 | 171 | 4,25 | 0,93 | 0,55 | 100 | 26,14 | 6,8   | 501,8 | 95   | 7,6  | 4,29 | 61,2 |
| 82 | 4,63  | 12,6 | 184 | 2,56 | 1,11 | 0,69 | 100 | 31,91 | 2,8   | 260,7 | 8    | 6,01 | 3,82 | 21,9 |
| 83 | 4,96  | 10,5 | 255 | 2,42 | 1,97 | 1,26 | 48  | 18,33 | 3,0   | 121,8 | 111  | 5,77 | 3,38 | 7,2  |
| 84 | 7,19  | 13   | 231 | 5,08 | 1,51 | 0,59 | 99  | 52,32 | >40,0 | 553,5 | 132  | 6,75 | 4,16 | 1,9  |
| 85 | 5,57  | 12,7 | 400 | 3,61 | 1,3  | 0,71 | 108 | 28,32 | 7,2   | 668,2 | 12   | 7,59 | 4,40 | 1,9  |
| 86 | 7,55  | 13,6 | 232 | 5,45 | 1,57 | 0,67 | 100 | 30,25 | 2,2   | 594   | 34   | 6,38 | 3,92 | 24,6 |
| 87 | 10,45 | 13,7 | 246 | 6,89 | 2,72 | 0,92 | 92  | 49,43 | 6,0   | 391,7 | 478  | 7,51 | 4,45 | <0,6 |
| 88 | 6,67  | 15,8 | 342 | 4,29 | 1,8  | 0,83 | 125 | 7,46  | 9,6   | 407,9 | 253  | 7,91 | 4,97 | 1,1  |
| 89 | 3,23  | 10,7 | 113 | 1,79 | 1,07 | 0,62 | 113 | 35,31 | 17,1  | 301   | 59   | 5,64 | 3,68 | <0,6 |
| 90 | 5,37  | 12,8 | 203 | 2,28 | 1,9  | 0,64 | 89  | 37,19 | 10,5  | 679,9 | 265  | 6,99 | 4,3  | 1,1  |
| 91 | 11,16 | 12,3 | 254 | 6,94 | 3,1  | 0,8  | 79  | 46,53 | 6,2   | 644,9 | 46   | 7,03 | 3,28 | 12,6 |
| 92 | 4,47  | 13,7 | 226 | 2,31 | 1,34 | 0,77 | 114 | 37,64 | 3,5   | 664,0 | 74   | 7,11 | 4,53 | 5,0  |
| 93 | 2,47  | 11,4 | 96  | 1,37 | 0,61 | 1,08 | 71  | 40,72 | 3,4   | 371,0 | 82   | 7,06 | 3,76 | 18,1 |

|                              |         |                      |         |         |           |         |         |           |         |         |           |         |         |         |
|------------------------------|---------|----------------------|---------|---------|-----------|---------|---------|-----------|---------|---------|-----------|---------|---------|---------|
| 94                           | 5,01    | 16,2                 | 263     | 3,14    | 1,48      | 0,92    | 110     | 9,88      | 4,2     | 959,2   | 98        | 6,35    | 3,91    | 1,1     |
| Values<br>below<br>reference | 15(16%) | 30(32%)<br>F/M=11/19 | 13(14%) | 8(8,5%) | 21(22,5%) | 6(6,5%) | 19(20%) | 49(52%)   | 32(34%) | 6(6,5%) | 26(27,5%) | 18(19%) | 16(17%) | 0(0%)   |
| Values<br>above<br>reference | 8(8,5%) | 0(0%)                | 1(1%)   | 5(5,5%) | 0(0%)     | 15(16%) | 0(0%)   | 10(10,5%) | 4(4%)   | 18(19%) | 9(9,5%)   | 1(1%)   | 0(0%)   | 28(30%) |

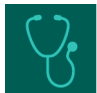

Table S3. Correlations of age of first symptoms, diagnosis and BMI

|                          |             | diagnosis | age of first<br>symptoms | BMI |
|--------------------------|-------------|-----------|--------------------------|-----|
| Diagnosis                | Pearson's r | —         |                          |     |
|                          | p-value     | —         |                          |     |
| Age of first<br>symptoms | Pearson's r | 0.678     | —                        |     |
|                          | p-value     | < .001    | —                        |     |
| BMI                      | Pearson's r | 0.196     | 0.273                    | —   |
|                          | p-value     | 0.060     | 0.008                    | —   |

BMI weakly but statistically significantly ( $p < 0.05$ ) correlates with the age of onset of symptoms.
